# Supplementary material for: Effect of Nitrogen Dopant Agents in the Performance of Graphene-Based Cathodes for Li-S Batteries
Source: MDPI journal article supplement (doi:10.3390/nano14060489), 2024-03-08
Supplement: s1 [file s1]

# Effect of Nitrogen Dopant Agents in the Performance of Graphene-Based Cathodes for Li-S Batteries

Adrián Licari, Almudena Benítez \*, Juan Luis Gómez-Cámer, Rafael Trócoli and Álvaro Caballero \*

Dpto. Química Inorgánica e Ingeniería Química, Instituto Químico para la Energía y el Medioambiente (IQUEMA), Facultad de Ciencias, Universidad de Córdoba, 14071, Córdoba, Spain.

\* Correspondence: q62beta@uco.es (A.B.); alvaro.caballero@uco.es (Á.C.);

Tel.: +34-957218621 (A.B.); +34-957218620 (Á.C.)

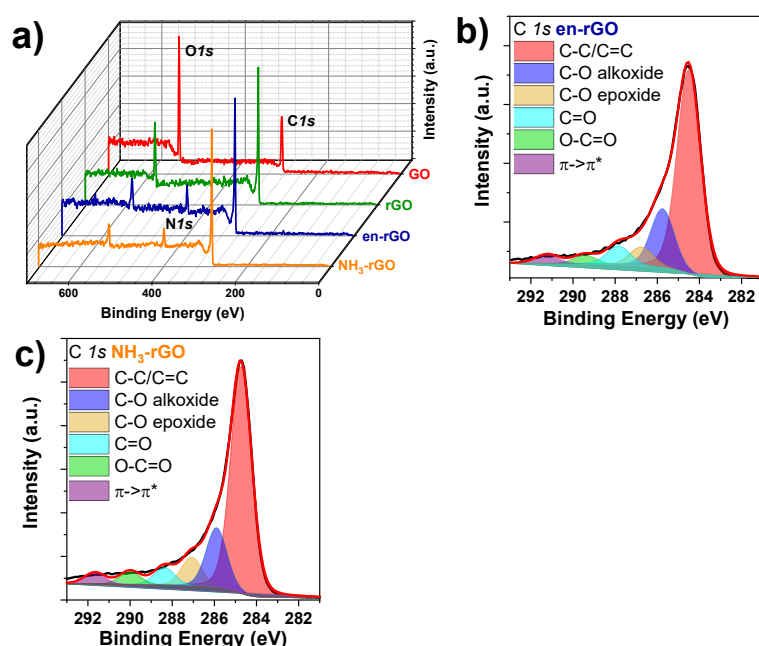

**Figure S1.** a) XPS survey for the GO, rGO, en-rGO and NH<sub>3</sub>-rGO samples; XPS spectrum of the C1s signal for the b) en-rGO, and c) NH<sub>3</sub>-rGO samples.

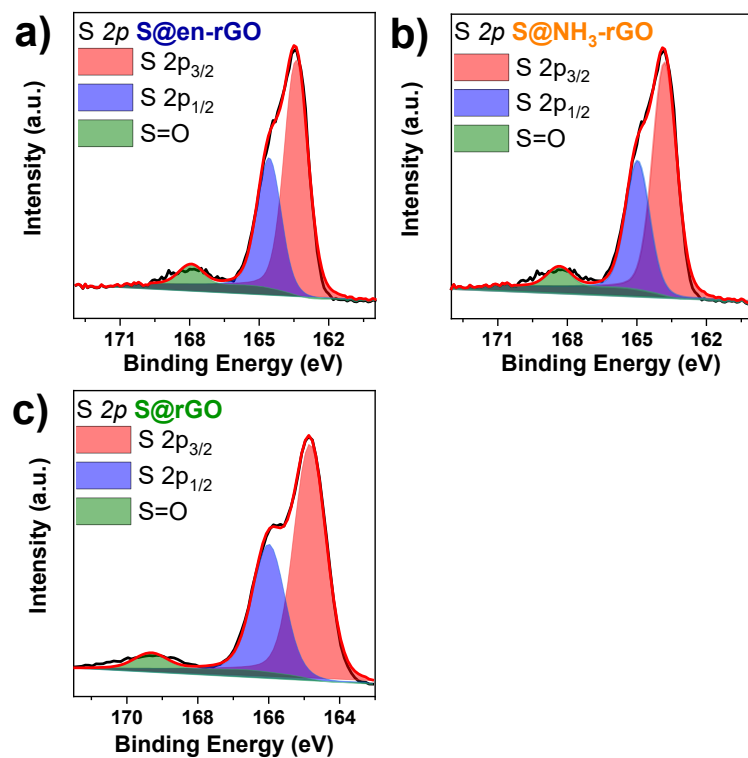

**Figure S2.** XPS spectrum of the S 2p signal for the a) S@en-GO, b) S@NH<sub>3</sub>-rGO, and c) S@rGO samples.

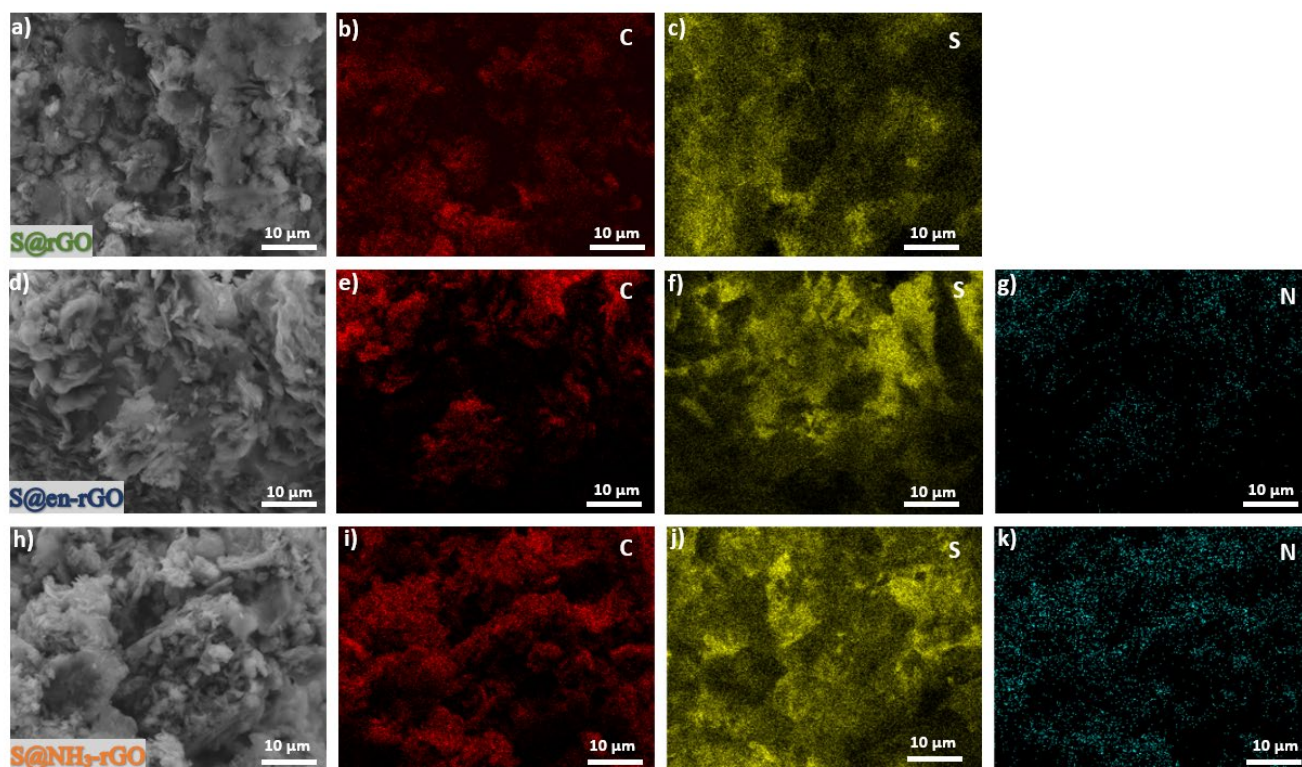

**Figure S3.** SEM images of the a) S@rGO, d) S@en-rGO and h) S@NH<sub>3</sub>-rGO samples; EDX analysis of the S@rGO sample: b) carbon and c) sulfur; S@en-rGO sample: e) carbon, f) sulfur and g) nitrogen; and S@NH<sub>3</sub>-rGO sample: i) carbon, j) sulfur and k) nitrogen.

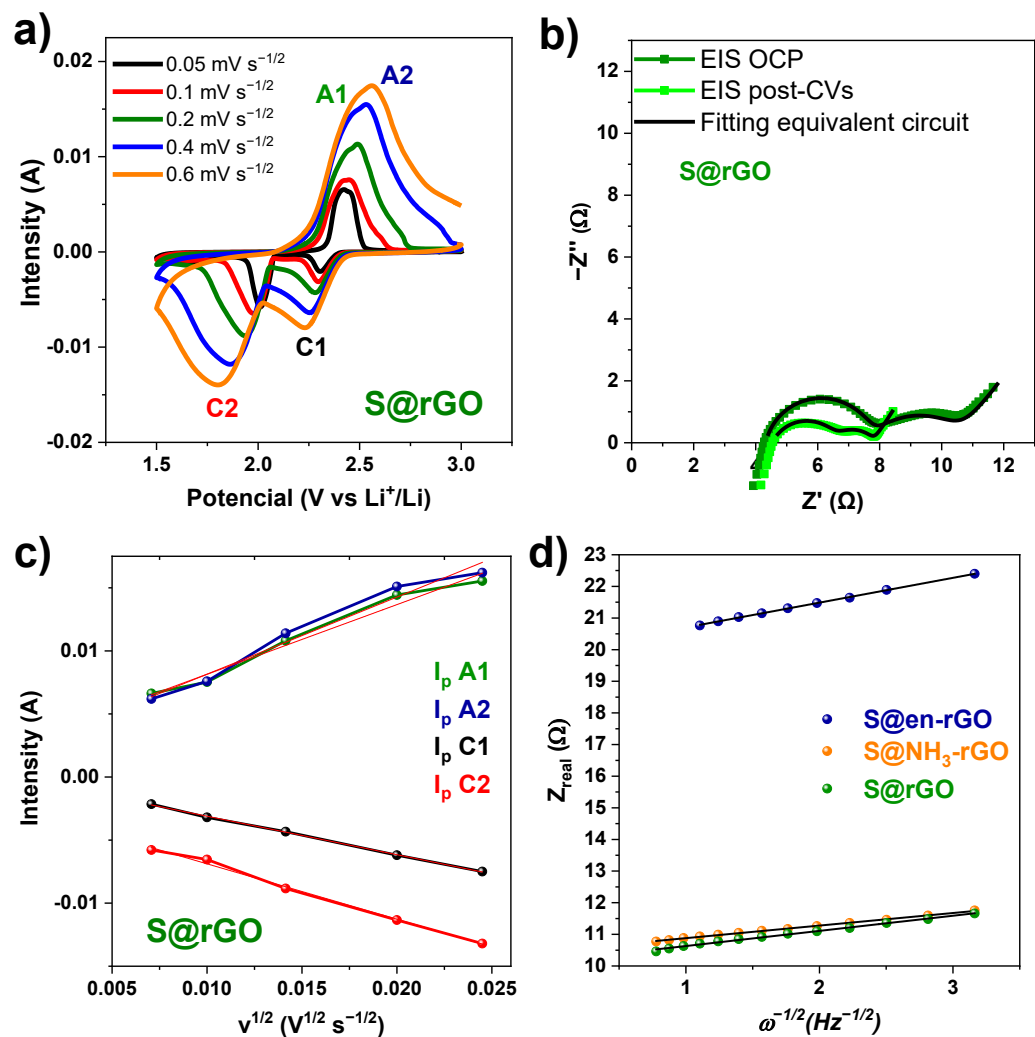

**Figure S4.** a) Cycle voltammograms at 0.05, 0.1, 0.2, 0.4 and 0.6 mV s<sup>-1</sup> between 3.0 and 1.5 V for the S@rGO electrode; b) Impedance spectra for S@rGO electrode; c) Graphical representation of peak intensity versus sweep speed elevated to a half for the S@rGO electrode; and d) Graphical representation of real impedance component (Z<sub>real</sub>) versus  $\omega^{-1/2}$  in the Warburg region to evaluate the  $\sigma$  term for equation (2) for the S@en-GO, S@NH<sub>3</sub>-rGO and S@rGO electrodes.

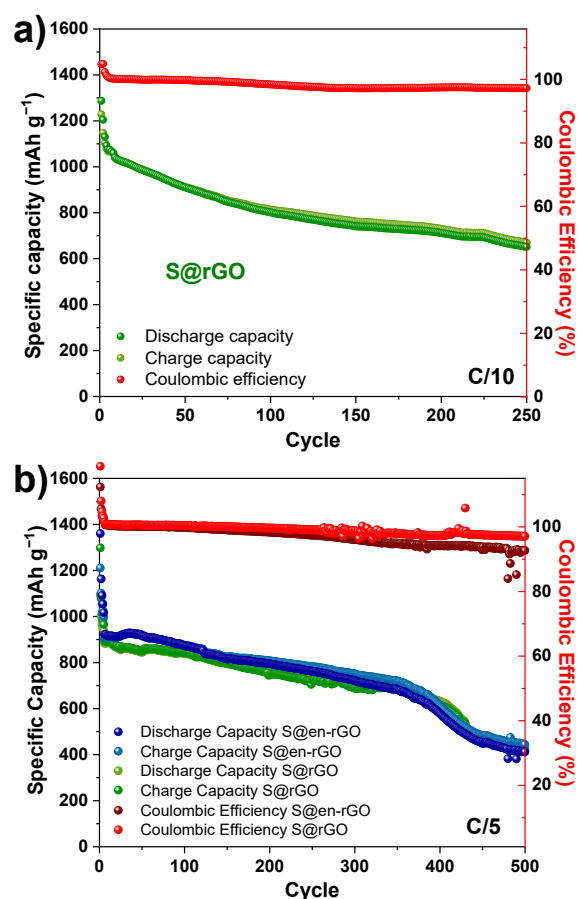

**Figure S5.** a) Long-term discharge/charge capacity values as a function of the cycle number and the coulombic efficiency at C/10 rate for the S@rGO electrode; b) Long-term discharge/charge capacity values as a function of the cycle number and the coulombic efficiency at C/5 rate for S@en-rGO and S@rGO electrodes.

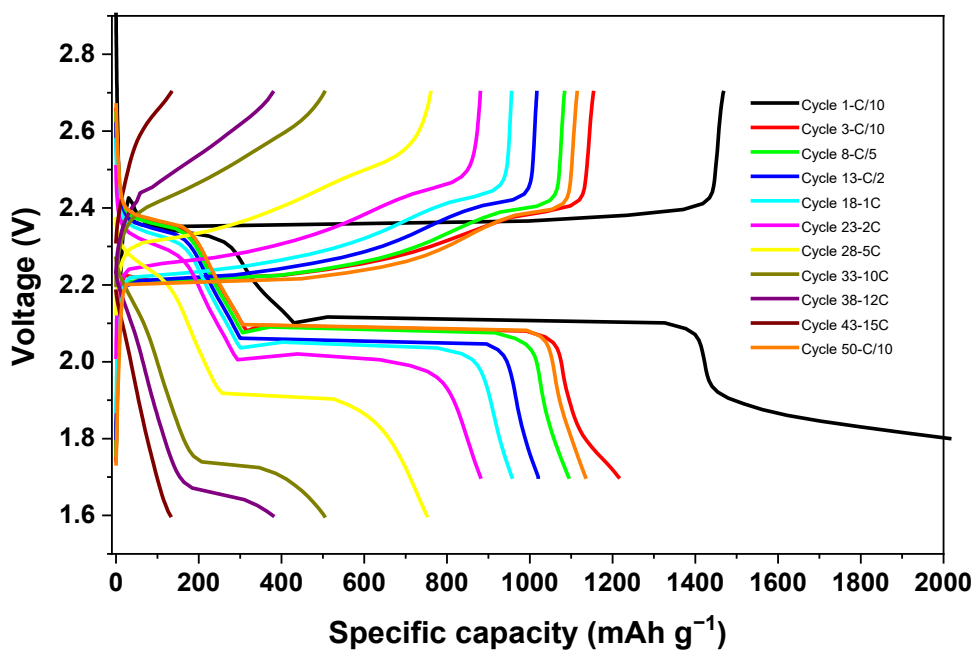

**Figure S6.** Charge/discharge profiles at C/10, C/5, C/2, 1C, 2C, 5C, 10C, 12C, and 15C rates of the Li-S cells with the S@NH<sub>3</sub>-rGO electrode.

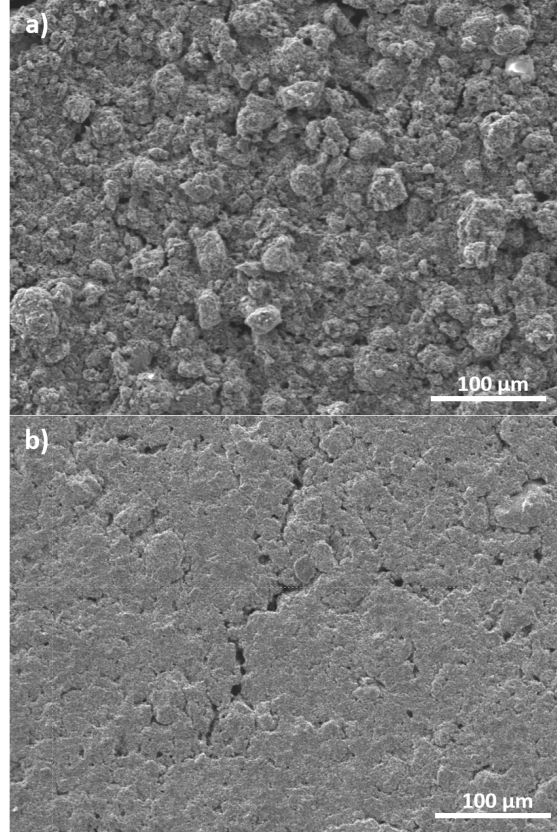

**Figure S7.** SEM images of the NH<sub>3</sub>-rGO electrode (a) before and (b) after rate capability test (C/10, C/8, C/5, C/3, C/2, 1C and 2C; 5 cycles each and C/10 again during 50 more cycles).

**Table S1.** Values of the impedances' components,  $\chi^2$ ,  $\tau$  and Li<sup>+</sup> ion diffusion coefficients (cm<sup>2</sup> s<sup>-1</sup>) of the S@en-rGO, S@NH<sub>3</sub>-rGO and S@rGO electrodes obtained by applying the equation (2).

| Samples                | EIS     | $\chi^2$             | $R_e(\Omega)$ | $R_{int}(\Omega)$ | $R_{ct}(\Omega)$ | $\tau_{ct}(s)$ | $\sigma(\Omega \cdot s^{-1/2})$ | $D_{EIS}$            |
|------------------------|---------|----------------------|---------------|-------------------|------------------|----------------|---------------------------------|----------------------|
| S@en-rGO               | OCP     | $2.80 \cdot 10^{-4}$ | 5.42          | 11.49             | 3.86             | 0.014          | 0.78                            | $2.05 \cdot 10^{-9}$ |
|                        | Post-CV | $4.90 \cdot 10^{-4}$ | 4.65          | 2.41              | 3.57             |                |                                 |                      |
| S@NH <sub>3</sub> -rGO | OCP     | $1.20 \cdot 10^{-3}$ | 4.51          | 3.52              | 2.94             | 0.004          | 0.40                            | $7.96 \cdot 10^{-9}$ |
|                        | Post-CV | $1.48 \cdot 10^{-3}$ | 3.48          | 2.36              | 0.94             |                |                                 |                      |
| S@rGO                  | OCP     | $1.10 \cdot 10^{-3}$ | 4.33          | 3.40              | 2.97             | 0.008          | 0.48                            | $5.49 \cdot 10^{-9}$ |
|                        | Post-CV | $1.27 \cdot 10^{-3}$ | 4.54          | 2.08              | 1.20             |                |                                 |                      |

**Table S2.** Li<sup>+</sup> ion diffusion coefficients (cm<sup>2</sup> s<sup>-1</sup>) of the S@en-rGO, S@NH<sub>3</sub>-rGO and S@rGO electrodes obtained by applying the Randles-Sevcik equation (1).

|                      | S@en-rGO             | S@NH <sub>3</sub> -rGO | S@rGO                |
|----------------------|----------------------|------------------------|----------------------|
| A1                   | 0.60                 | 0.62                   | 0.55                 |
| A2                   | 0.64                 | 0.68                   | 0.61                 |
| C1                   | -0.29                | -0.34                  | -0.31                |
| C2                   | -0.40                | -0.50                  | -0.44                |
| D <sub>Li</sub> (A1) | $2.89 \cdot 10^{-6}$ | $3.10 \cdot 10^{-6}$   | $2.43 \cdot 10^{-6}$ |
| D <sub>Li</sub> (A2) | $3.27 \cdot 10^{-6}$ | $3.69 \cdot 10^{-6}$   | $2.97 \cdot 10^{-6}$ |
| D <sub>Li</sub> (C1) | $6.59 \cdot 10^{-7}$ | $9.34 \cdot 10^{-7}$   | $7.40 \cdot 10^{-7}$ |
| D <sub>Li</sub> (C2) | $1.29 \cdot 10^{-6}$ | $2.02 \cdot 10^{-6}$   | $1.53 \cdot 10^{-6}$ |
